# Supplementary material
Source: publisher site journal article supplement (http://kjim.org/upload/media/kjim-2019-020-suppl3.pdf)
Supplement: Supplementary file 1 [file kjim-2019-020-suppl3.pdf]

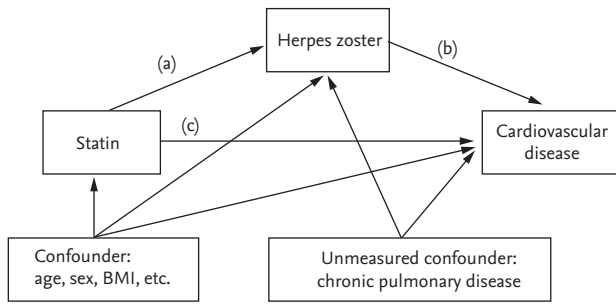

**Supplementary Figure 1.** The association of statin, herpes zoster, and cardiovascular disease with measured and unmeasured confounding variables. BMI, body mass index.
